# Supplementary material for: Hierarchical self-assembly of a PS-b-P4VP/PS-b-PNIPAM mixture into multicompartment micelles and their response to two-dimensional confinement
Source: Royal Society of Chemistry journal article supplement (doi:10.1039/c9cp05180e), 2019-11-26
Supplement: c9cp05180e1.pdf [file c9cp05180e1.pdf]

**Electronic Supplementary Information**

**Hierarchical Self-Assembly of PS-*b*-P4VP/PS-*b*-PNIPAM Mixture into Multicompartment Micelles  
and Its Response to Two-Dimensional Confinements**

Xuan Yue,<sup>a,b</sup> Zhen Geng,<sup>a,c\*</sup> Nan Yan,<sup>a</sup> Wei Jiang<sup>a,b\*</sup>

<sup>a</sup> State Key Laboratory of Polymer Physics and Chemistry, Changchun Institute of Applied Chemistry,  
Chinese Academy of Sciences, Changchun 130022, China

<sup>b</sup> University of Sciences and Technology of China, Hefei 230026, People's Republic of China

<sup>c</sup> Huazhong University of Sciences and Technology, Wuhan 430074, China

*\* Corresponding authors*

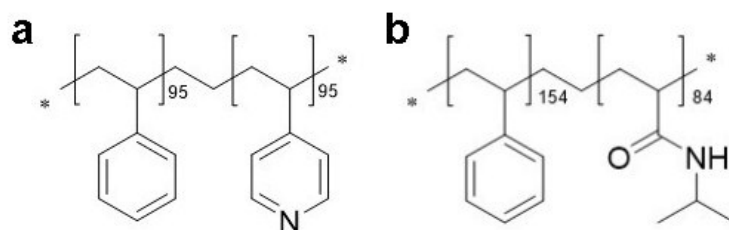

**Figure S1.** Molecular schematic drawings of PS-*b*-P4VP (a) and PS-*b*-PNIPAM (b). The subscripts refer to the number of corresponding repeated units.

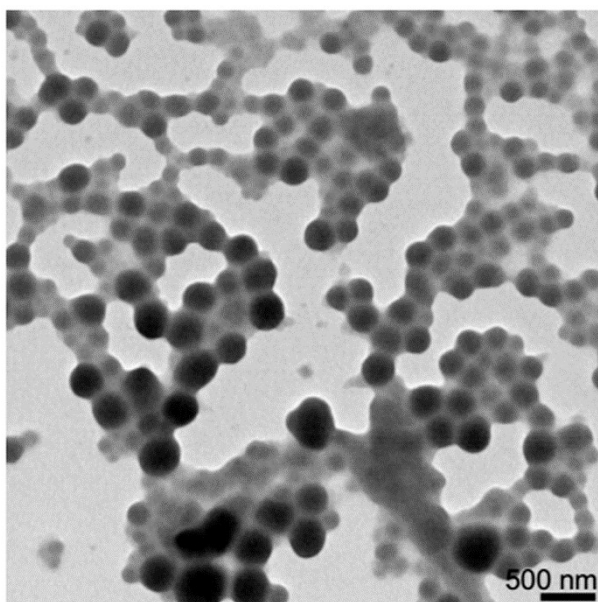

**Figure S2.** TEM image of the micelles self-assembled from PS-*b*-PNIPAM in THF/Water (84/16, v/v).

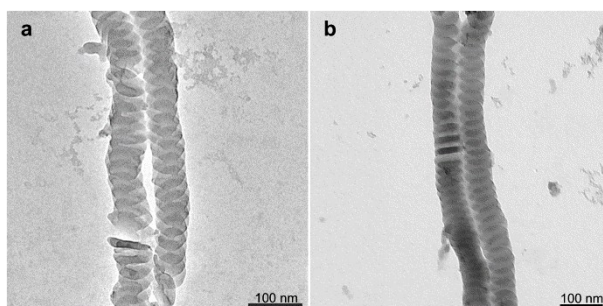

**Figure S3.** TEM image for samples obtained from the confined self-assembly of PS<sub>9.8k</sub>-*b*-P4VP<sub>10k</sub>/PS<sub>16k</sub>-*b*-PNIPAM<sub>9.5k</sub> mixture (3/7) after of stirring for one day (a) and three days (b).

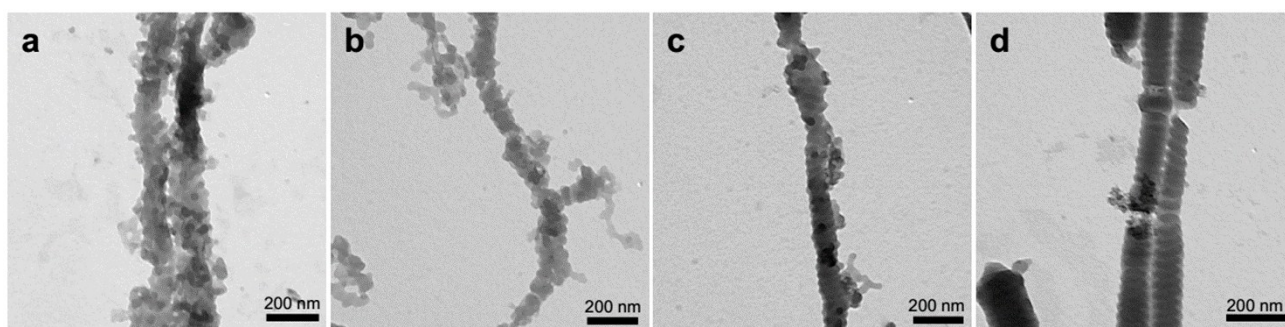

**Figure S4.** TEM images of the dynamics of the micelles confined in nanopores of AAO template (a) 0min, (b) 2min, (c) 5min, (d) 20min.

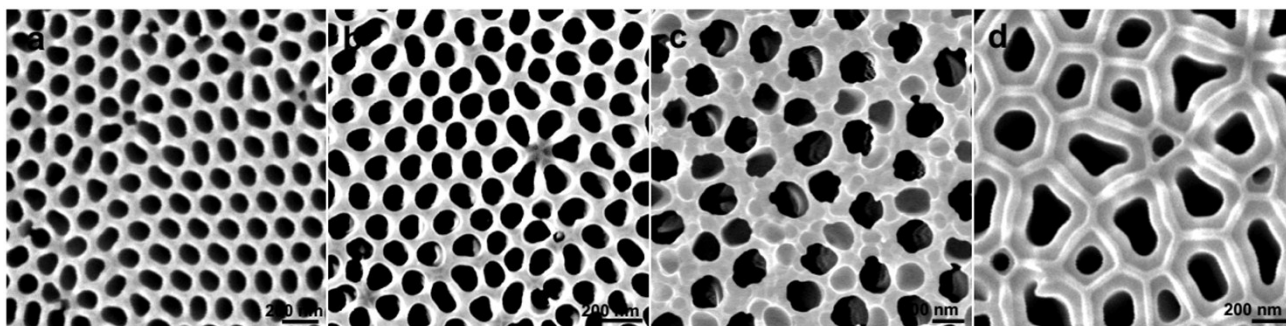

**Figure S5.** SEM images of AAO membrane with different pore size: (a)  $93.7 \pm 5.9$  nm, (b)  $111.2 \pm 5.9$  nm, (c)  $187.5 \pm 18.6$  nm and (d)  $253.7 \pm 34.9$  nm, respectively.

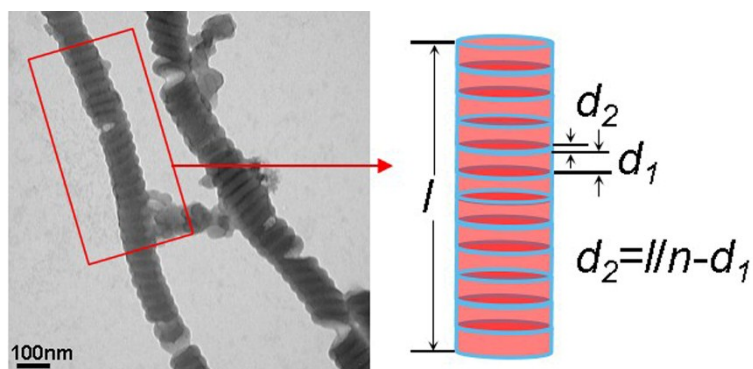

**Figure S6.** Schematic description of the measurement method for the PS and P4VP/PNIPAM layer thickness. The  $l$  is the local length of the LMCs,  $n$  is the number of the disks,  $d_1$  is the thickness of PS layer and  $d_2$  is the thickness of P4VP/PNIPAM layer.

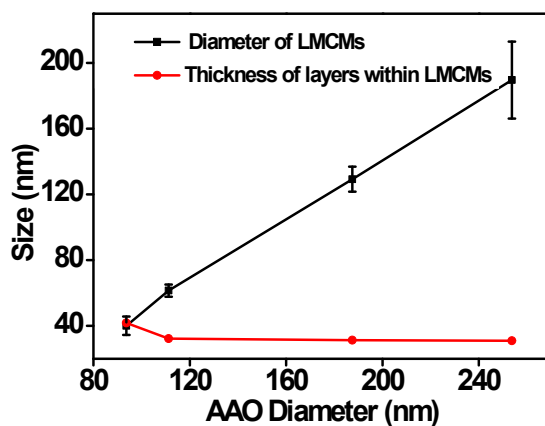

**Figure S7.** Diameters of LMCs and the average thickness of layers along with the nanopores of AAO template.

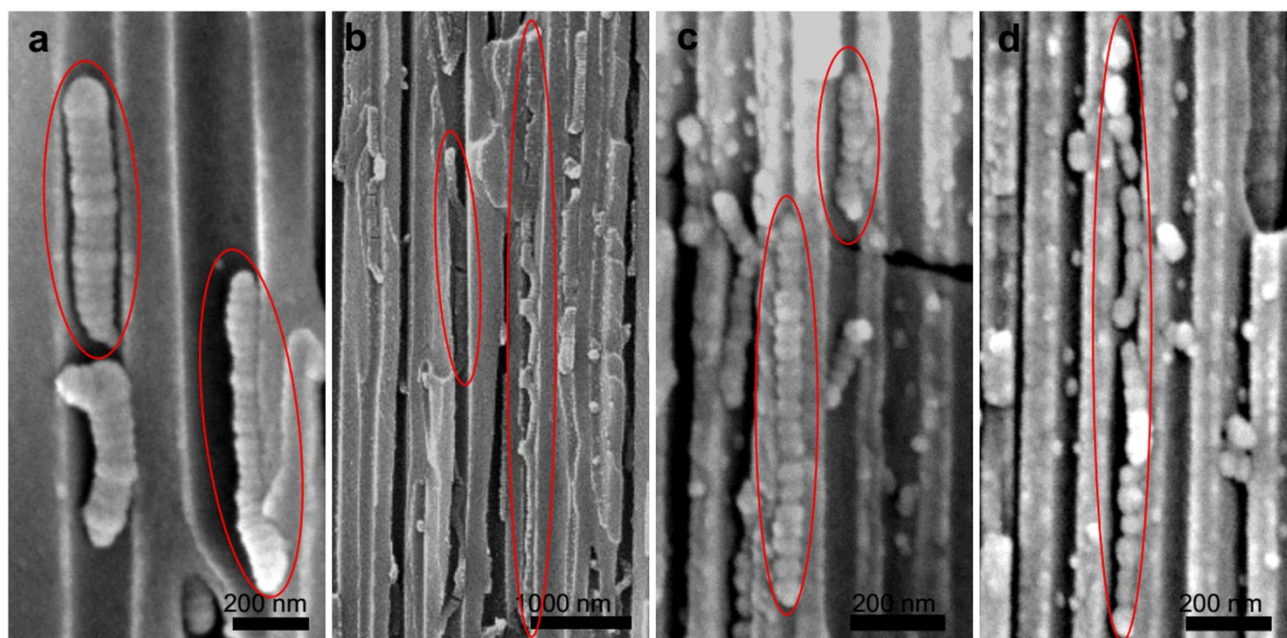

**Figure S8.** SEM images of micelles with different AAO membrane nanopores diameter (a)  $253.7 \pm 34.9$  nm, (b)  $187.5 \pm 18.6$  nm, (c)  $111.2 \pm 5.9$  nm, (d)  $93.7 \pm 5.9$  nm.
